1 **Article title**

2 Effects of a rifampicin pre-treatment on linezolid pharmacokinetics

3

4 **Author names and affiliations**

5 Fumiyasu Okazaki<sup>1</sup>, Yasuhiro Tsuji<sup>1\*</sup>, Yoshihiro Seto<sup>1</sup>, Chika Ogami<sup>1</sup>, Yoshihiro Yamamoto<sup>2</sup>,  
6 and Hideto To<sup>1</sup>

7 1. Department of Medical Pharmaceutics, Faculty of Pharmaceutical Sciences, University of  
8 Toyama, Toyama, Japan

9 2. Department of Clinical Infectious Diseases, Graduate School of Medicine and  
10 Pharmaceutical Sciences for Research University of Toyama, Toyama, Japan

11

12 **Corresponding author**

13 Yasuhiro Tsuji, Ph.D

14 Department of Medical Pharmaceutics, Faculty of Pharmaceutical Sciences, University of  
15 Toyama, 2630 Sugitani, Toyama, 930-0194, Japan; Tel.: +81-76-415-8815; Fax:  
16 +81-76-434-7584; E-mail: ytsuji@pha.u-toyama.ac.jp

17

18 **Running Head**

19 LZD pharmacokinetics with RIF pre-treatment

20

21 **Keywords**

22 linezolid; rifampicin; pharmacokinetics; metabolic enzymes

23

24 **Word count:** 1,658 words

25 **Tables and figures:** 2 figures, 0 Tables/2 total

## 26    **Abstract**

27                    Linezolid is an oxazolidinone antibiotic that effectively treats methicillin-resistant  
 28    *Staphylococcus aureus* (MRSA) and vancomycin-resistant *Enterococci* (VRE). Since  
 29    rifampicin induces other antibiotic effects, it is combined with linezolid in therapeutic regimes.  
 30    However, linezolid blood concentrations are reduced by this combination, which increases the  
 31    risk of the emergence of antibiotic-resistant bacteria. We herein demonstrated that the  
 32    combination of linezolid with rifampicin inhibited its absorption and promoted its elimination,  
 33    but not through microsomal enzymes. Our results indicate that the combination of linezolid  
 34    with rifampicin reduces linezolid blood concentrations via metabolic enzymes.

## 35 **Introduction**

36           Linezolid is an oxazolidinone antibiotic that is used in the treatment of  
37 methicillin-resistant *Staphylococcus aureus* (MRSA) and vancomycin-resistant enterococci  
38 (VRE). Linezolid inhibits initiation complex formation of the 70S ribosome by binding to the  
39 50S ribosomal subunit[1]. This mechanism of antibiotic action differs from those of other  
40 antibiotics, and, thus, linezolid is not cross-resistant to other antibiotics [2]. Therefore, these  
41 characteristics of linezolid are advantageous for decreasing the risk of antibiotic-resistant  
42 bacteria emerging due to reductions in blood linezolid concentrations when administered in  
43 combination with other drugs.

44           Rifampicin is an anti-tuberculosis drug that inhibits RNA polymerase  $\beta$ , and is  
45 effective against MRSA. The combination of rifampicin with one or more drugs is  
46 recommended in order to prevent the emergence of rifampicin-resistant bacteria. As  
47 rifampicin penetrates biofilms and exerts bactericidal antibacterial effects, it has been the  
48 treatment of choice for infection control [3]. However, rifampicin-resistant bacteria may  
49 emerge when rifampicin is administered alone. Therefore, the use of rifampicin in  
50 combination with other antibiotics is strongly recommended [4, 5].

51           The combination of rifampicin with linezolid has been shown to inhibit the  
52 generation of rifampicin-resistant bacteria [6], and also induces the effects of linezolid [7, 8].  
53 However, numerous linezolid combination studies with rifampicin demonstrated that blood

54 linezolid concentrations decreased when it was combined with rifampicin [9, 10]. Reductions  
 55 in blood linezolid concentrations may increase the risk of drug treatment failure as well as the  
 56 emergence of antibiotic-resistant bacteria. Therefore, the mechanisms underlying the  
 57 pharmacokinetic interactions between linezolid and rifampicin need to be elucidated in more  
 58 detail. The observed reduction of linezolid concentration when combined with rifampicin has  
 59 gained attention recently. Although these reductions have been extensively examined, specific  
 60 studies have not yet been performed.

61 Therefore, the present study had 2 aims: (1) to examine if rifampicin pre-treatment  
 62 promotes the metabolism or elimination of linezolid in an *in vivo* study, and (3) to clarify  
 63 whether the induction of cytochrome P450 (CYP) by a rifampicin pre-treatment promotes the  
 64 degradation of linezolid in an *in vitro* study.

## 65 **Materials and Methods**

### 66 ***Animals***

67 Five-week-old male ICR mice (Sankyo Labo Service Corporation, Inc., Tokyo,  
68 Japan) were housed under a standard light/dark cycle (light phase: 7:00-19:00) at a  
69 temperature of  $24 \pm 1^\circ\text{C}$  and humidity of  $60 \pm 10\%$  with *ad libitum* access to food and water.  
70 Anesthesia was maintained with intermittent administration of intraperitoneal pentobarbital.  
71 All experiments were performed in accordance with the Guide for the Care and Use of  
72 Laboratory Animals distributed by the U.S. National Institutes of Health [11] and the rules  
73 and regulations of animal experiments in University of Toyama (permit number:  
74 A2012PHA-45).

### 75 ***RT-PCR analysis***

76 Mice were orally administered rifampicin (100 mg/kg) or vehicle (control group)  
77 once per day for 7 days. One day after the final administration, livers were removed from  
78 mice. Total mRNA was extracted using RNAiso Plus (TaKaRa Bio Inc., Otsu, Japan) and  
79 cDNA was synthesized with the PrimeScript RT reagent Kit with the gDNA Eraser (TaKaRa  
80 Bio Inc.). Real-time PCR was performed using the KOD SYBR qPCR Mix (TOYOBO, Kita,  
81 Japan) with StepOnePlus (Thermo Fisher Scientific, Waltham, MA, USA). All samples were  
82 normalized with the housekeeping gene *Gapdh*.

### 83 ***Collection of serum after the administration of linezolid***

Mice were orally administered rifampicin (100 mg/kg) or vehicle (control group) once per day for 7 days. One day after the final rifampicin administration, linezolid (25 mg/kg) was orally or intraperitoneally administered to mice. Blood samples were obtained from the heart after the administration of linezolid. Whole blood was allowed to clot, and sera were collected by centrifugation at 3,000 ×g for 15 min.

#### ***In vitro pharmacokinetics study***

Mice were orally administered rifampicin (100 mg/kg) or vehicle (control group) for 7 days. Rifampicin (100 mg/kg) was orally administered to mice once per day for 7 days. One day after the final rifampicin administration, the liver was removed from mice. Total protein was extracted using T-PER Tissue Protein Extraction Reagent (Thermo Fisher Scientific). Protein concentrations were measured using the BCA Protein Assay Kit (Thermo Fisher Scientific). Linezolid solution (final concentration, 25 µg/mL) and NADPH (final concentration, 2.5 mM) were added to the total protein solution (final concentration, 20 µg/mL) and incubated at 37°C. Methanol was added to stop the reaction 0.5, 1, 2, and 4 h after the incubation. Linezolid concentrations were measured using high performance liquid chromatography (HPLC). Dexamethasone (final concentration, 12.5 µg/mL) was used as a positive control.

#### ***Measurement of drug concentrations by HPLC***

Linezolid concentrations were measured using an HPLC method with ultraviolet

(UV) detection, according to a previously reported method [12]. Dexamethasone concentrations were measured using an HPLC method with UV detection. The HPLC system (Shimadzu Corporation) consisted of a LC-2010 pump, LC-2010 autosampler, LC-2010 UV detector, and LC-2010 column oven. Data were collected and analyzed using LC solution. Separation was performed on an ODS Hypersil column (Cadenza 5CD-C18, 150 mm × 4.6 mm, 5 µm; Imtakt Co.). A solution of 1% phosphoric acid was used for the mobile phase, and pH was adjusted to 5 by the addition of 10 M sodium hydroxide. The pump flow rate was 1.0 mL/min. The column temperature was maintained at 40°C. The wavelength of optimum UV detection was set at 254 nm. Calibration curves were linear over a concentration range of 1 to 100 µg/mL. Intra/inter-day CV was less than 5.0%, and LLOQ was 1 µg/mL for dexamethasone concentrations.

### *Statistical analysis*

An unpaired *t*-test was used to analyze differences between two groups. Dunnett's test was used for post-hoc comparisons. Differences between the groups with a P value of < 0.05 were considered to be significant.



## Results

### Influence of the rifampicin pre-treatment on linezolid pharmacokinetics *in vivo*

In order to investigate whether a rifampicin pre-treatment influences the absorption, metabolism, and elimination of linezolid, mice were orally administered linezolid one day after the rifampicin pre-treatment and blood linezolid concentrations were measured using HPLC. The rifampicin pre-treatment reduced linezolid blood concentrations at all sampling points, and decreased AUC by 30% from that in the control group (Figure 1A). In order to clarify whether the rifampicin pre-treatment promotes the metabolic or eliminated process, linezolid was intravenously administered one day after an injection of rifampicin and linezolid blood concentrations were then measured using HPLC. The results obtained showed that linezolid blood concentrations were reduced by the rifampicin pre-treatment (Figure 1B).

### Influence of the rifampicin pre-treatment on the expression of *Cyp3a11* and drug degradation in liver metabolic enzymes

Rifampicin induces the expression of CYP3A4, and mouse *Cyp3a11* is homologous with human *CYP3A4* [13-15]. We investigated the induction of *Cyp3a11* expression by the rifampicin pre-treatment, and found that *Cyp3a11* levels were higher than those in the control group (Figure 2A): a 4-fold increase in the liver and a 40-fold increase in the intestines. Liver contain a number of enzymes that metabolize drugs, including CYPs. In order to investigate the reductions induced in linezolid concentrations by enzymes in liver metabolic enzymes, we

137 measured linezolid concentrations in an *in vitro* study. Linezolid concentrations were not  
138 reduced by the extract solution by liver pre-treated with rifampicin. Since dexamethasone is  
139 metabolized by CYPs, we performed the same experiment using dexamethasone as a positive  
140 control. Dexamethasone concentrations were reduced by the extract solution by liver  
141 pre-treated with rifampicin (Figure 2B).

## Discussion

Linezolid uses a novel mechanism of action against microbes, and its antibiotic effects are induced when it is combined with other antibiotics. Since linezolid is not metabolized by CYPs, it does not affect the pharmacokinetics of other antibiotics [2, 16]. However, linezolid blood concentrations are reduced when it is combined with rifampicin, and this has recently been attracting increasing attention [9, 17].

In the present study, in order to avoid direct interactions with rifampicin, mice were treated with rifampicin once per day for 7 days until one day before the administration of linezolid. Linezolid blood concentrations were reduced by the rifampicin pre-treatment. To the best of our knowledge, rifampicin is a substrate of some organic anion transporting polypeptides (OATPs), but does not induce the expression of these transporters. P-gp is an efflux transporter, and its inhibition has been shown to increase AUC, thereby reducing drug elimination [18]. Previous studies reported that rifampicin is a pregnane X receptor (PXR) ligand that induces P-gp [19, 20]. Rifampicin affects the concentrations of other drugs through P-gp [21]. However, linezolid is not a substrate of P-gp or OATP according to Pfizer, and a previous study also suggested that these transporters do not affect its pharmacokinetics [9]. Therefore, the present results indicated that efflux transporters did not affect the pharmacokinetics of linezolid after the rifampicin pre-treatment.

Rifampicin also induces CYP3A expression via PXR [22]. Dexamethasone is a

substrate of CYPs, and its concentration decreased in the *in vitro* experiments conducted in the present study, whereas that of linezolid did not. Previous studies suggested that linezolid is not a substrate of or is poorly metabolized by CYPs [2, 16]. Moreover, the total protein solution, extracted from liver after rifampicin or dexamethasone treatment, were used in *in vitro* study. Therefore, these findings suggest that the pharmacokinetics of linezolid are influenced by factors without liver metabolic enzymes.

Undesired reductions in blood antibiotic concentrations lead to failed drug treatments and the emergence of antibiotic-resistant bacteria. We herein demonstrated that linezolid blood concentrations were reduced by the rifampicin pre-treatment, which affected drug absorption and metabolism/elimination. Liver metabolic enzymes did not affect the pharmacokinetics of linezolid with the rifampicin pre-treatment. Previous studies suggested that linezolid is metabolite by the lactone and lactam pathway [23, 24]. Although it is unclear that rifampicin induces the lactone and lactam pathway, these results suggest that transporters and liver metabolic enzymes poorly affect the pharmacokinetics of linezolid in rifampicin combination therapy.

177

## 178 **Funding**

179 This work was supported by JSPS KAKENHI Grant Number 17K08438.

180

## 181 **Ethical approval**

182 Approval was not required.

183

## 184 **Acknowledgments**

185 This work was supported by the Life Science Research Center, University of Toyama.

186

## 187 **Conflict of interests**

188 The authors declare no conflict of interest associated with this manuscript.

## References

1. Hamel JC, Stapert D, Moerman JK, Ford CW. Linezolid, critical characteristics. *Infection*. 2000;28(1):60-4. Epub 2001/02/07. PubMed PMID: 10744479.
2. Fung HB, Kirschenbaum HL, Ojofeimi BO. Linezolid: an oxazolidinone antimicrobial agent. *Clinical therapeutics*. 2001;23(3):356-91. Epub 2001/04/25. PubMed PMID: 11318073.
3. Perlroth J, Kuo M, Tan J, Bayer AS, Miller LG. Adjunctive use of rifampin for the treatment of *Staphylococcus aureus* infections: a systematic review of the literature. *Archives of internal medicine*. 2008;168(8):805-19. Epub 2008/04/30. doi: 10.1001/archinte.168.8.805. PubMed PMID: 18443255.
4. Forrest GN, Tamura K. Rifampin combination therapy for nonmycobacterial infections. *Clinical microbiology reviews*. 2010;23(1):14-34. Epub 2010/01/13. doi: 10.1128/cmr.00034-09. PubMed PMID: 20065324; PubMed Central PMCID: PMC2806656.
5. Sanders WE, Jr. Rifampin. *Annals of internal medicine*. 1976;85(1):82-6. Epub 1976/07/01. PubMed PMID: 937928.
6. Vergidis P, Rouse MS, Euba G, Karau MJ, Schmidt SM, Mandrekar JN, et al. Treatment with linezolid or vancomycin in combination with rifampin is effective in an animal model of methicillin-resistant *Staphylococcus aureus* foreign body osteomyelitis. *Antimicrobial*

- 208 agents and chemotherapy. 2011;55(3):1182-6. Epub 2010/12/30. doi:  
209 10.1128/aac.00740-10. PubMed PMID: 21189340; PubMed Central PMCID:  
210 PMCPMC3067063.
- 211 7. Cabellos C, Garrigos C, Taberner F, Force E, Pachon-Ibanez ME. Experimental study of  
212 the efficacy of linezolid alone and in combinations against experimental meningitis due to  
213 *Staphylococcus aureus* strains with decreased susceptibility to beta-lactams and  
214 glycopeptides. *Journal of infection and chemotherapy : official journal of the Japan Society*  
215 *of Chemotherapy*. 2014;20(9):563-8. Epub 2014/06/30. doi: 10.1016/j.jiac.2014.05.008.  
216 PubMed PMID: 24973908.
- 217 8. Drusano GL, Neely M, Van Guilder M, Schumitzky A, Brown D, Fikes S, et al. Analysis of  
218 combination drug therapy to develop regimens with shortened duration of treatment for  
219 tuberculosis. *PloS one*. 2014;9(7):e101311. Epub 2014/07/09. doi:  
220 10.1371/journal.pone.0101311. PubMed PMID: 25003557; PubMed Central PMCID:  
221 PMCPMC4086932.
- 222 9. Gandelman K, Zhu T, Fahmi OA, Glue P, Lian K, Obach RS, et al. Unexpected effect of  
223 rifampin on the pharmacokinetics of linezolid: in silico and in vitro approaches to explain  
224 its mechanism. *Journal of clinical pharmacology*. 2011;51(2):229-36. Epub 2010/04/08.  
225 doi: 10.1177/0091270010366445. PubMed PMID: 20371736.
- 226 10. Ashizawa N, Tsuji Y, Kawago K, Higashi Y, Tashiro M, Nogami M, et al.

- 227 Successful treatment of methicillin-resistant *Staphylococcus aureus* osteomyelitis with  
228 combination therapy using linezolid and rifampicin under therapeutic drug monitoring.  
229 *Journal of infection and chemotherapy : official journal of the Japan Society of*  
230 *Chemotherapy*. 2016;22(5):331-4. Epub 2016/01/07. doi: 10.1016/j.jiac.2015.11.012.  
231 PubMed PMID: 26732509.
- 232 11. National Research Council Committee for the Update of the Guide for the C, Use of  
233 Laboratory A. The National Academies Collection: Reports funded by National Institutes  
234 of Health. In: th, editor. *Guide for the Care and Use of Laboratory Animals*. Washington  
235 (DC): National Academies Press (US)  
236 National Academy of Sciences.; 2011.
- 237 12. Tsuji Y, Holford NHG, Kasai H, Ogami C, Heo YA, Higashi Y, et al. Population  
238 pharmacokinetics and pharmacodynamics of linezolid-induced thrombocytopenia in  
239 hospitalized patients. *British journal of clinical pharmacology*. 2017;83(8):1758-72. Epub  
240 2017/02/12. doi: 10.1111/bcp.13262. PubMed PMID: 28186644; PubMed Central PMCID:  
241 PMC5510085.
- 242 13. Staudinger JL, Goodwin B, Jones SA, Hawkins-Brown D, MacKenzie KI, LaTour  
243 A, et al. The nuclear receptor PXR is a lithocholic acid sensor that protects against liver  
244 toxicity. *Proceedings of the National Academy of Sciences of the United States of America*.  
245 2001;98(6):3369-74. Epub 2001/03/15. doi: 10.1073/pnas.051551698. PubMed PMID:



- 11248085; PubMed Central PMCID: PMC30660.
14. Bodin K, Lindbom U, Diczfalussy U. Novel pathways of bile acid metabolism involving CYP3A4. *Biochimica et biophysica acta*. 2005;1687(1-3):84-93. Epub 2005/02/15. doi: 10.1016/j.bbali.2004.11.003. PubMed PMID: 15708356.
15. Holmstock N, Gonzalez FJ, Baes M, Annaert P, Augustijns P. PXR/CYP3A4-humanized mice for studying drug-drug interactions involving intestinal P-glycoprotein. *Molecular pharmaceutics*. 2013;10(3):1056-62. Epub 2013/01/31. doi: 10.1021/mp300512r. PubMed PMID: 23360470; PubMed Central PMCID: PMC3594649.
16. Wynalda MA, Hauer MJ, Wienkers LC. Oxidation of the novel oxazolidinone antibiotic linezolid in human liver microsomes. *Drug metabolism and disposition: the biological fate of chemicals*. 2000;28(9):1014-7. Epub 2000/08/19. PubMed PMID: 10950842.
17. Egle H, Trittler R, Kummerer K, Lemmen SW. Linezolid and rifampin: Drug interaction contrary to expectations? *Clinical pharmacology and therapeutics*. 2005;77(5):451-3. Epub 2005/05/19. doi: 10.1016/j.clpt.2005.01.020. PubMed PMID: 15900290.
18. Mealey KL. Therapeutic implications of the MDR-1 gene. *Journal of veterinary pharmacology and therapeutics*. 2004;27(5):257-64. Epub 2004/10/27. doi:

- 10.1111/j.1365-2885.2004.00607.x. PubMed PMID: 15500562.
19. Tian R, Koyabu N, Morimoto S, Shoyama Y, Ohtani H, Sawada Y. Functional induction and de-induction of P-glycoprotein by St. John's wort and its ingredients in a human colon adenocarcinoma cell line. Drug metabolism and disposition: the biological fate of chemicals. 2005;33(4):547-54. Epub 2005/01/11. doi: 10.1124/dmd.104.002485. PubMed PMID: 15640377.
20. Chan GN, Patel R, Cummins CL, Bendayan R. Induction of P-glycoprotein by antiretroviral drugs in human brain microvessel endothelial cells. Antimicrobial agents and chemotherapy. 2013;57(9):4481-8. Epub 2013/07/10. doi: 10.1128/aac.00486-13. PubMed PMID: 23836171; PubMed Central PMCID: PMC3754350.
21. Ouwerkerk-Mahadevan S, Snoeys J, Peeters M, Beumont-Mauviel M, Simion A. Drug-Drug Interactions with the NS3/4A Protease Inhibitor Simeprevir. Clinical pharmacokinetics. 2016;55(2):197-208. Epub 2015/09/12. doi: 10.1007/s40262-015-0314-y. PubMed PMID: 26353895; PubMed Central PMCID: PMC4756048.
22. MacLeod AK, McLaughlin LA, Henderson CJ, Wolf CR. Activation status of the pregnane X receptor influences vemurafenib availability in humanized mouse models. Cancer research. 2015;75(21):4573-81. Epub 2015/09/13. doi: 10.1158/0008-5472.can-15-1454. PubMed PMID: 26363009; PubMed Central PMCID:

284 PMCPMC4634205.

285 23. MacGowan AP. Pharmacokinetic and pharmacodynamic profile of linezolid in  
 286 healthy volunteers and patients with Gram-positive infections. The Journal of antimicrobial  
 287 chemotherapy. 2003;51 Suppl 2:ii17-25. Epub 2003/05/06. doi: 10.1093/jac/dkg248.  
 288 PubMed PMID: 12730139.

289 24. Slatter JG, Stalker DJ, Feenstra KL, Welshman IR, Bruss JB, Sams JP, et al.  
 290 Pharmacokinetics, metabolism, and excretion of linezolid following an oral dose of  
 291 [(14)C]linezolid to healthy human subjects. Drug metabolism and disposition: the  
 292 biological fate of chemicals. 2001;29(8):1136-45. Epub 2001/07/17. PubMed PMID:  
 293 11454733.

294

## Figure legends

### Figure 1. Effects of the rifampicin pre-treatment on the pharmacokinetics of linezolid.

(A) Linezolid (25 mg/kg) was orally administered to mice (Control group). Mice were orally administered rifampicin (100 mg/kg) for 7 days. One day after the rifampicin pre-treatment, linezolid (25 mg/kg) was orally administered to mice (Rifampicin pre-treatment group).

(B) Linezolid (25 mg/kg) was intravenously administered to mice (Control group). Mice were orally administered rifampicin (100 mg/kg) for 7 days. One day after the rifampicin pre-treatment, linezolid (25 mg/kg) was intravenously administered to mice (Rifampicin pre-treatment group).

\*  $P < 0.05$  (unpaired  $t$ -test). Data are represented as the mean  $\pm$  S.D. ( $n = 3$  for each group).

### Figure 2. Influence of the induction of CYPs on the pharmacokinetics of linezolid

(A) Effects of the rifampicin pre-treatment on *Cyp3a11* expression. Mice were orally administered rifampicin (100 mg/kg) or vehicle (control group) for 7 days. \*\*  $P < 0.01$  (unpaired  $t$ -test).

314 (B) Effects of the rifampicin pre-treatment on linezolid and dexamethasone  
 315 concentrations in liver metabolic enzymes. \*  $P < 0.05$  (unpaired  $t$ -test), #  $P < 0.05$  vs 0  
 316 h (Dunnett's test).  
 317 Data are represented as the mean  $\pm$  S.D. (n = 3 for each group).

Figure 1

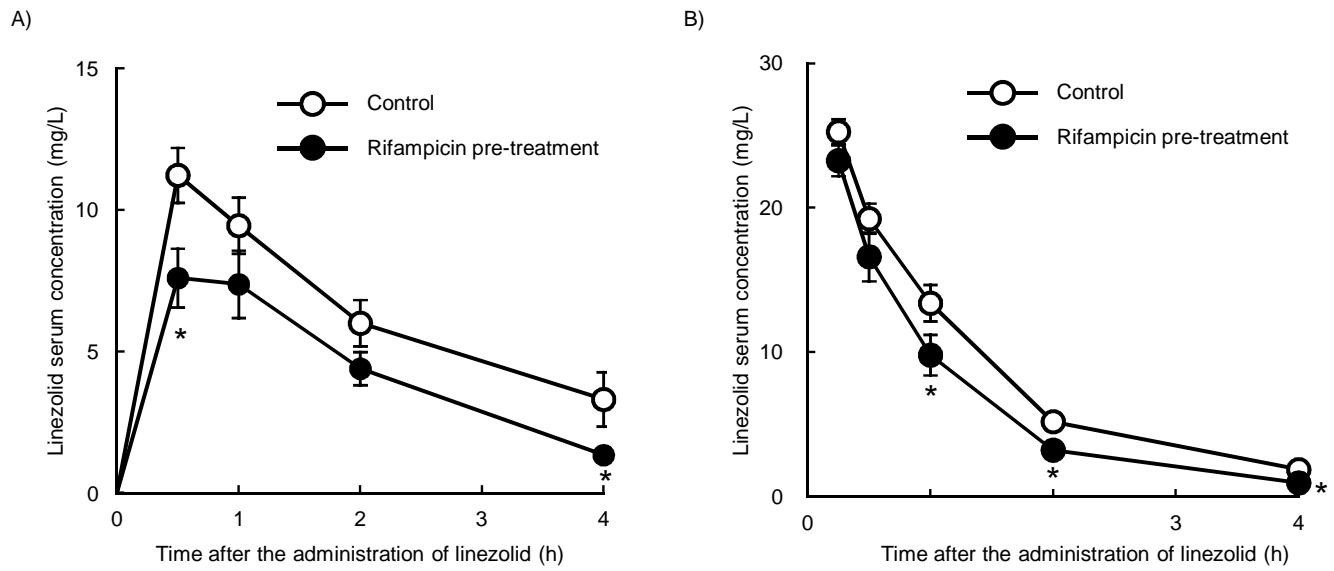

Figure 2

A)

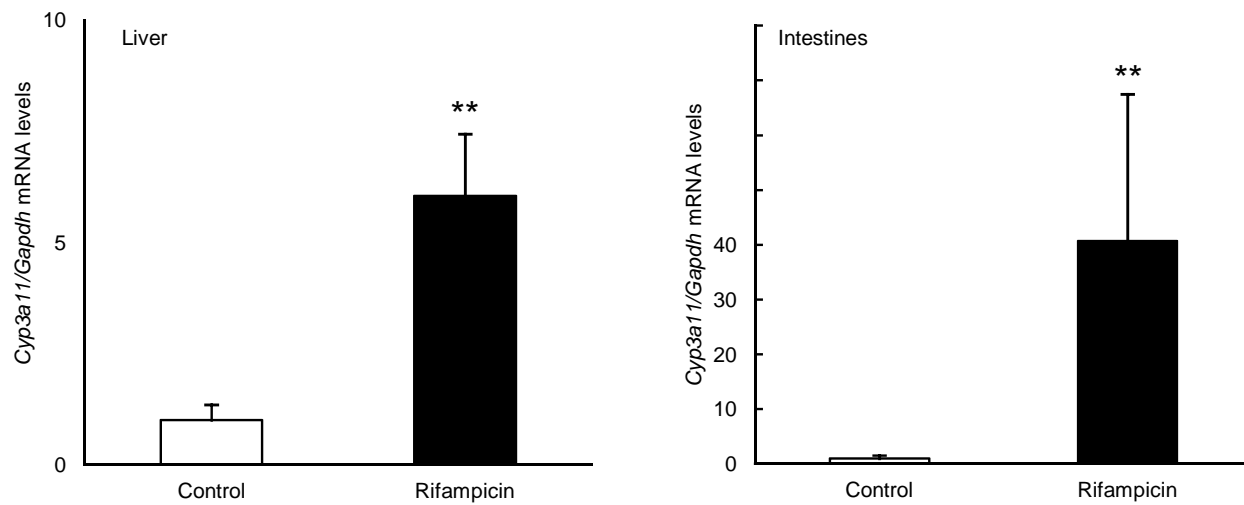

B)

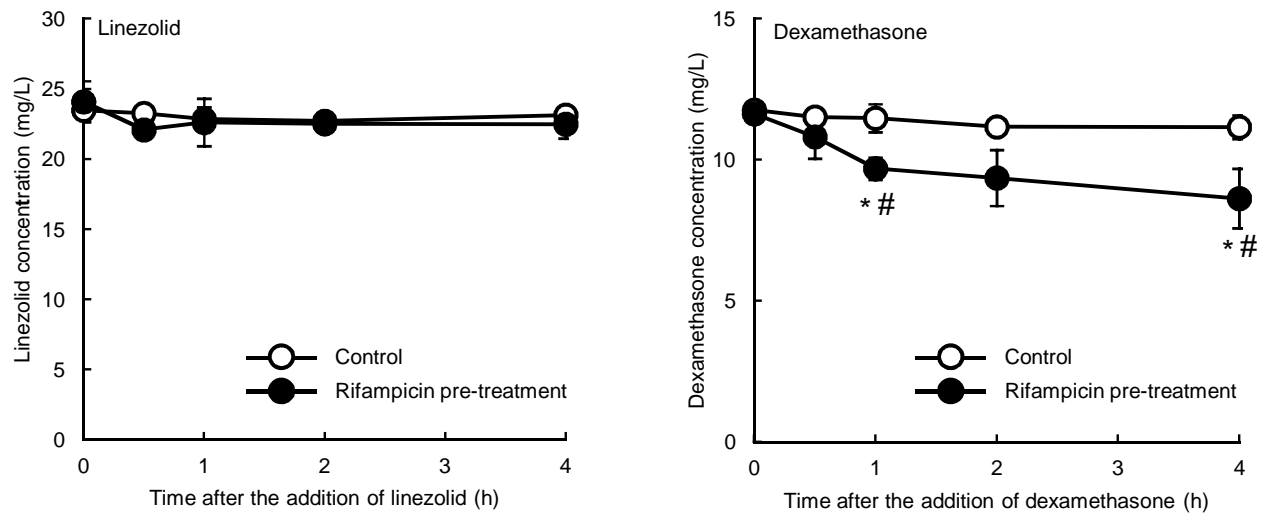

Source: http://biorxiv.org/content/10.1101/572610v1.full.pdf
